# Supplementary material for: Targeting DHX9 Triggers Tumor-Intrinsic Interferon Response and Replication Stress in Small Cell Lung Cancer
Source: PubMed Central journal article supplement — Cancer Discov. 2024 Jan 4;14(3):468–91. doi: 10.1158/2159-8290.CD-23-0486 (PMC10905673; doi:10.1158/2159-8290.cd-23-0486), 2024-01-04
Supplement: cd-23-0486_supplementary_figure_s1_suppsf1.pdf [file cd-23-0486_supplementary_figure_s1_suppsf1.pdf]

# Supplementary Figure S1

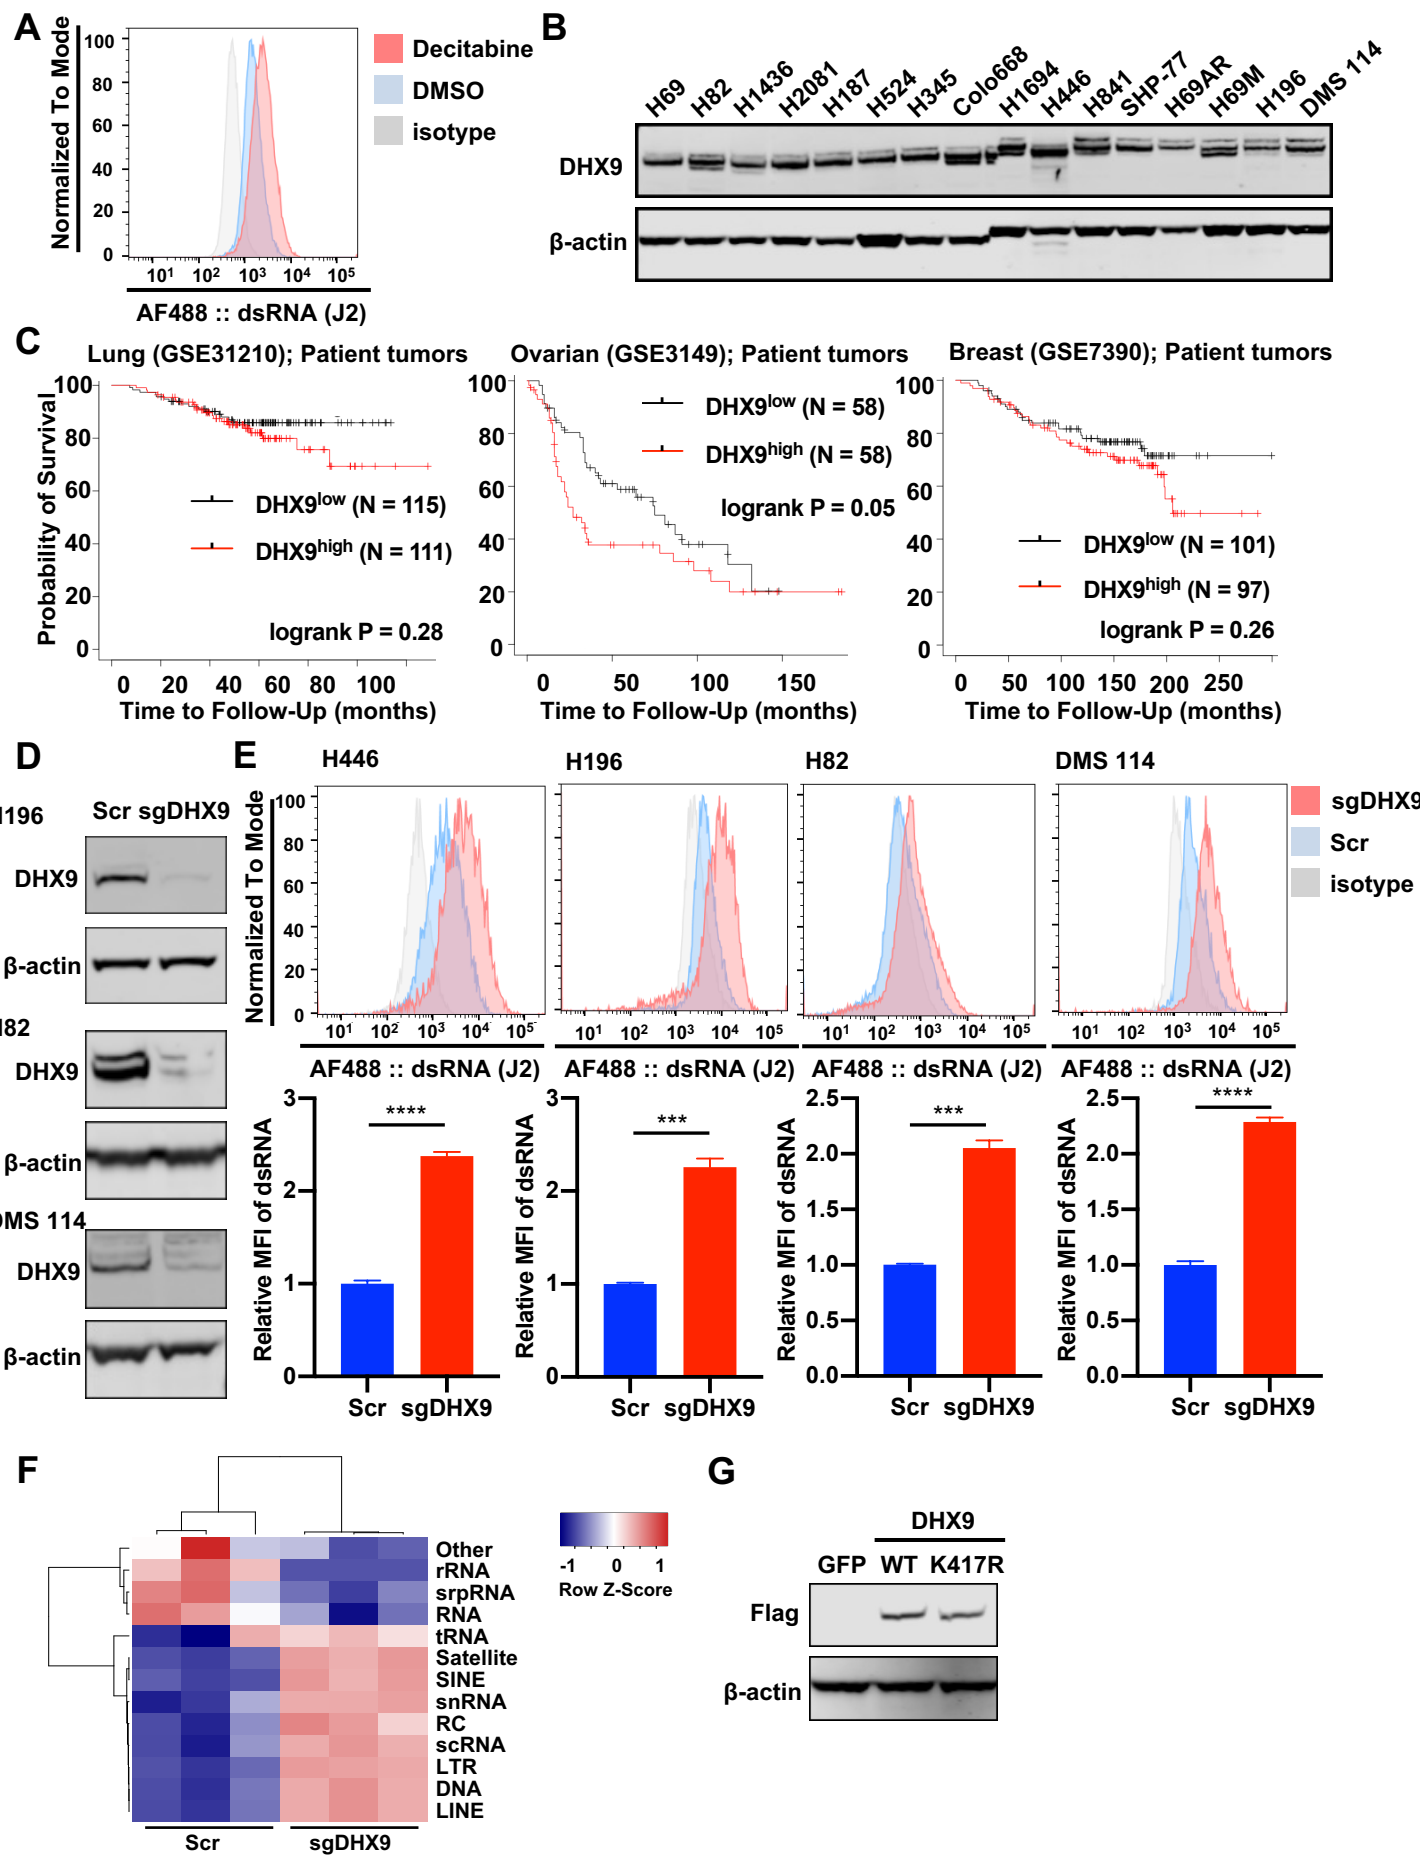

**Supplementary Figure S1.**

**A**, Flow cytometry analysis of intracellular dsRNA levels in H446 cells, treated with DMSO or 100 nM Decitabine. Data are representative of three independent experiments. **B**, Immunoblot (IB) of DHX9 protein in the indicated SCLC cell lines. **C**, Survival curve analysis of lung, ovarian and breast tumor patients. Data were downloaded from GEO database. **D**, Immunoblot (IB) of DHX9 protein in H196, H82, and DMS 114 cells (Scramble and sgDHX9). **E**, Flow cytometry analysis of intracellular dsRNA levels in H446, H196, H82, and DMS 114 cells (Scramble and sgDHX9). Data are representative of three independent experiments (top). Mean fluorescence intensity (MFI) was quantified by FlowJo (bottom) (n = 3). **F**, Heatmap of J2-RIP-seq results comparing Scramble and sgDHX9 (n = 3). **G**, Immunoblot (IB) of the indicated proteins in H446 cells overexpressing 3xFlag-DHX9 (WT/K417R) or Flag-GFP.

Data represent mean  $\pm$  SEM. ns, not significant; \*p < 0.05, \*\*p < 0.01, \*\*\*p < 0.001, \*\*\*\*p < 0.0001 by log-rank test (C) and unpaired Student's t test (E).
