# Supplementary material for: Targeting DHX9 Triggers Tumor-Intrinsic Interferon Response and Replication Stress in Small Cell Lung Cancer
Source: PubMed Central journal article supplement — Cancer Discov. 2024 Jan 4;14(3):468–91. doi: 10.1158/2159-8290.CD-23-0486 (PMC10905673; doi:10.1158/2159-8290.cd-23-0486), 2024-01-04
Supplement: cd-23-0486_supplementary_figure_s4_suppsf4.pdf [file cd-23-0486_supplementary_figure_s4_suppsf4.pdf]

# Supplementary Figure S4

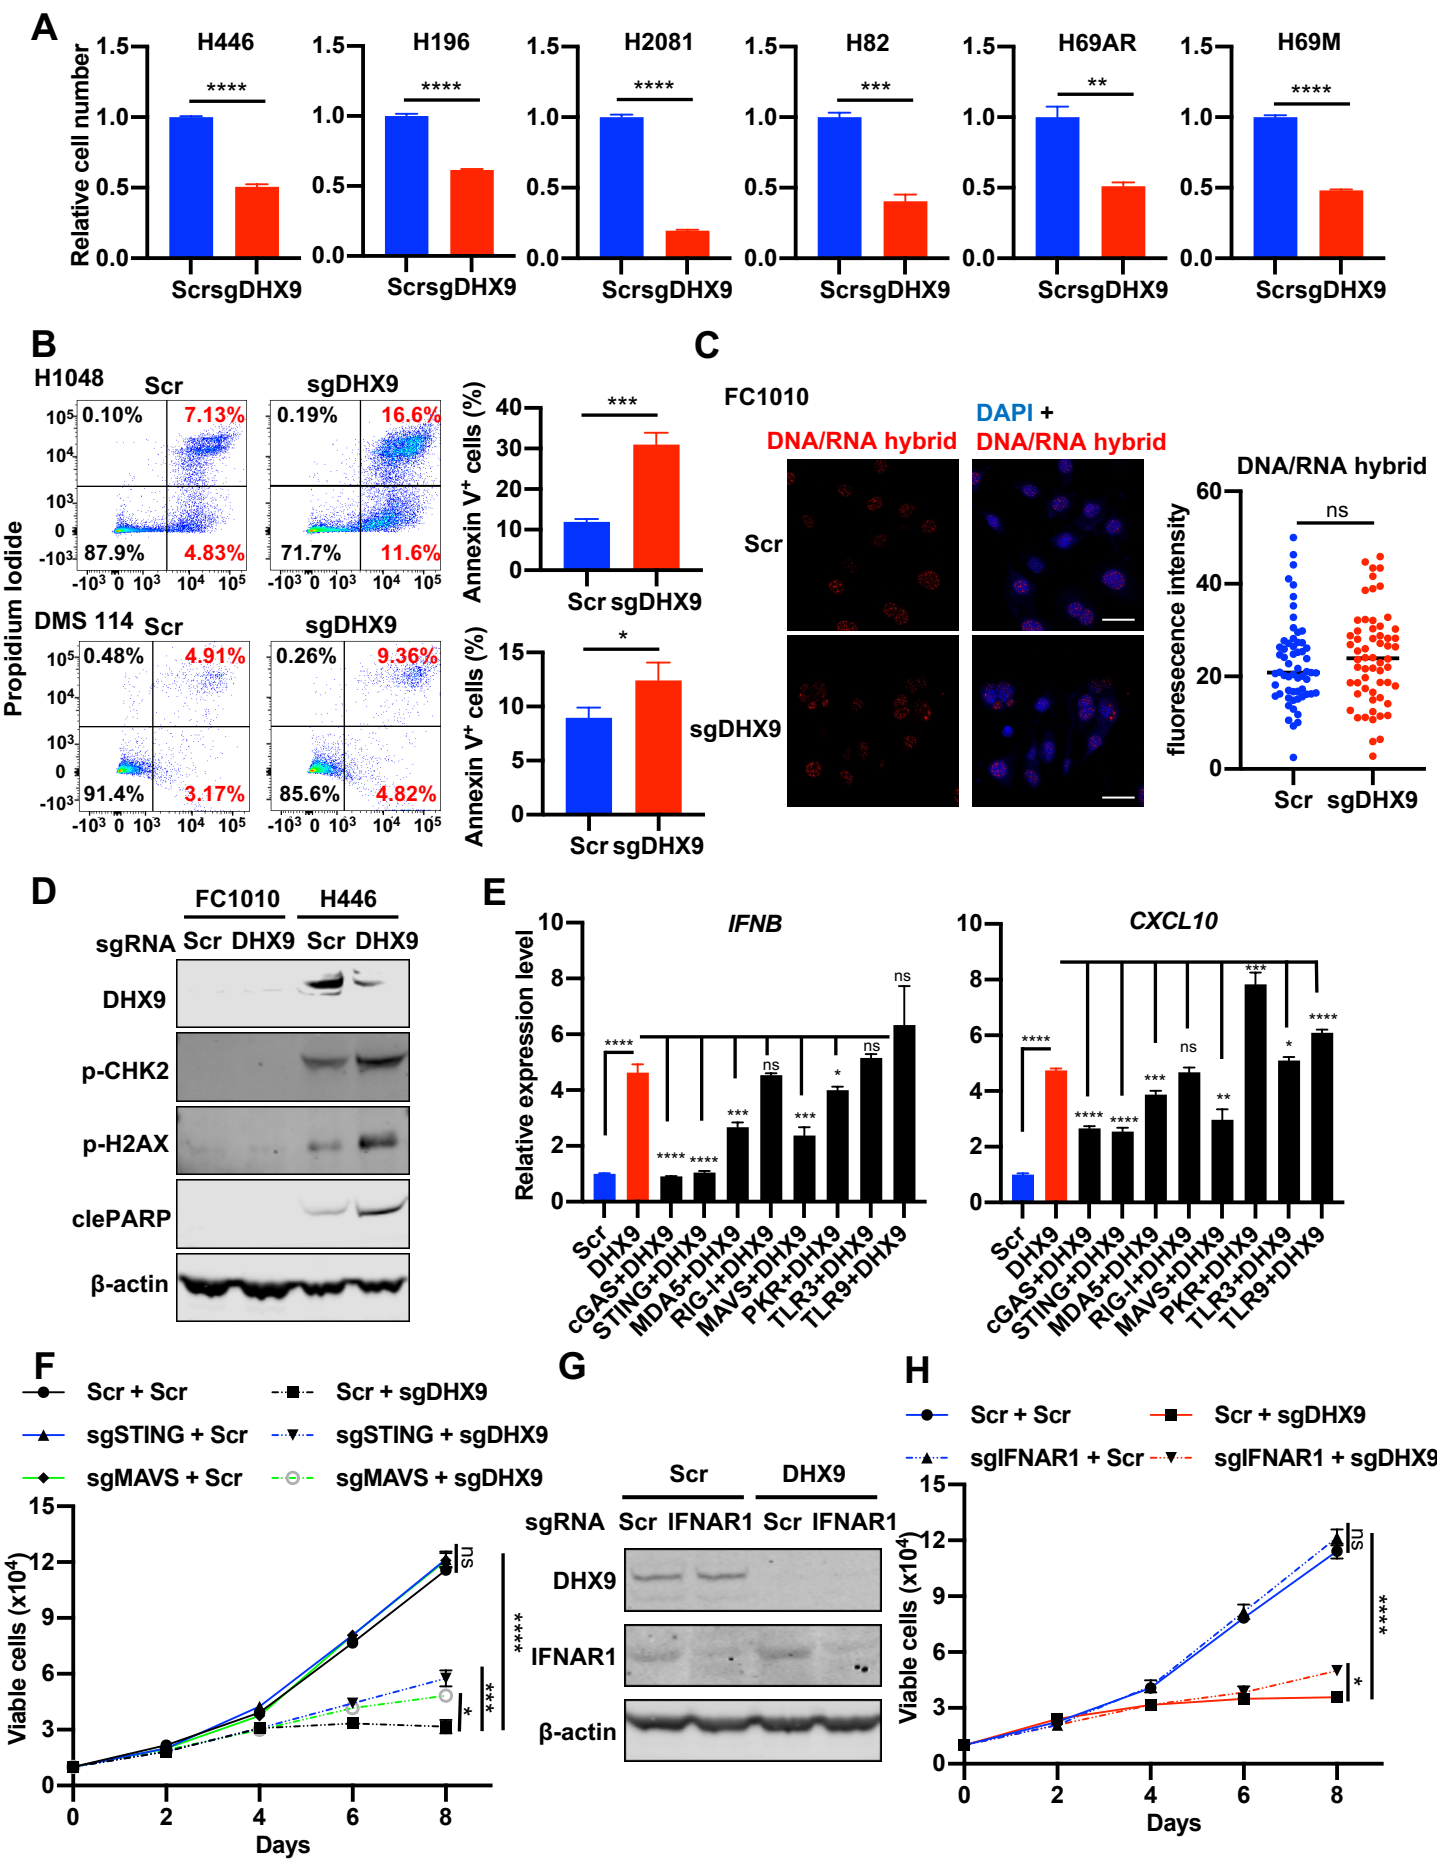

#### **Supplementary Figure S4.**

**A**, Relative cell number of the indicated SCLC cell lines. Luminescence of CellTiter-Glo was detected on Day 4 after seeding (n = 3). **B**, Flow cytometry analysis of apoptotic (annexin V+) cells in Scramble and sgDHX9 H1048 and DMS 114 cells. Data are representative of three independent experiments (left). Quantification of apoptotic cells is shown (right) (n = 3). **C**, Immunofluorescence images of DNA/RNA hybrid (red) staining of Scramble and sgDHX9 FC1010 cells (left) and quantification of fluorescence intensity (right) (60 cells were counted per group, n = 3). Scale bar = 50  $\mu$ m. **D**, Immunoblot (IB) of the indicated proteins in FC1010 and H446 cells (Scramble and sgDHX9). **E**, qRT-PCR analysis of IFNB and CXCL10 genes comparing H196 cells with the indicated sgRNA vectors (n = 3). 36B4 gene was used as a reference. **F**, Growth curves of H196 cells, with the indicated sgRNA vectors (n = 6). **G**, Immunoblot (IB) of the indicated proteins in H196 cells with the indicated sgRNA vectors. **H**, Growth curves of H196 cells, with the indicated sgRNA vectors (n = 6).

Data represent mean  $\pm$  SEM. ns, not significant; \*p < 0.05, \*\*p < 0.01, \*\*\*p < 0.001, \*\*\*\*p < 0.0001 by unpaired Student's t test (A, B, and C), one-way ANOVA (E), two-way ANOVA followed by Tukey's multiple comparisons test (F and H).
