# Supplementary material for: Targeting DHX9 Triggers Tumor-Intrinsic Interferon Response and Replication Stress in Small Cell Lung Cancer
Source: PubMed Central journal article supplement — Cancer Discov. 2024 Jan 4;14(3):468–91. doi: 10.1158/2159-8290.CD-23-0486 (PMC10905673; doi:10.1158/2159-8290.cd-23-0486), 2024-01-04
Supplement: cd-23-0486_supplementary_figure_s5_suppsf5.pdf [file cd-23-0486_supplementary_figure_s5_suppsf5.pdf]

# Supplementary Figure S5

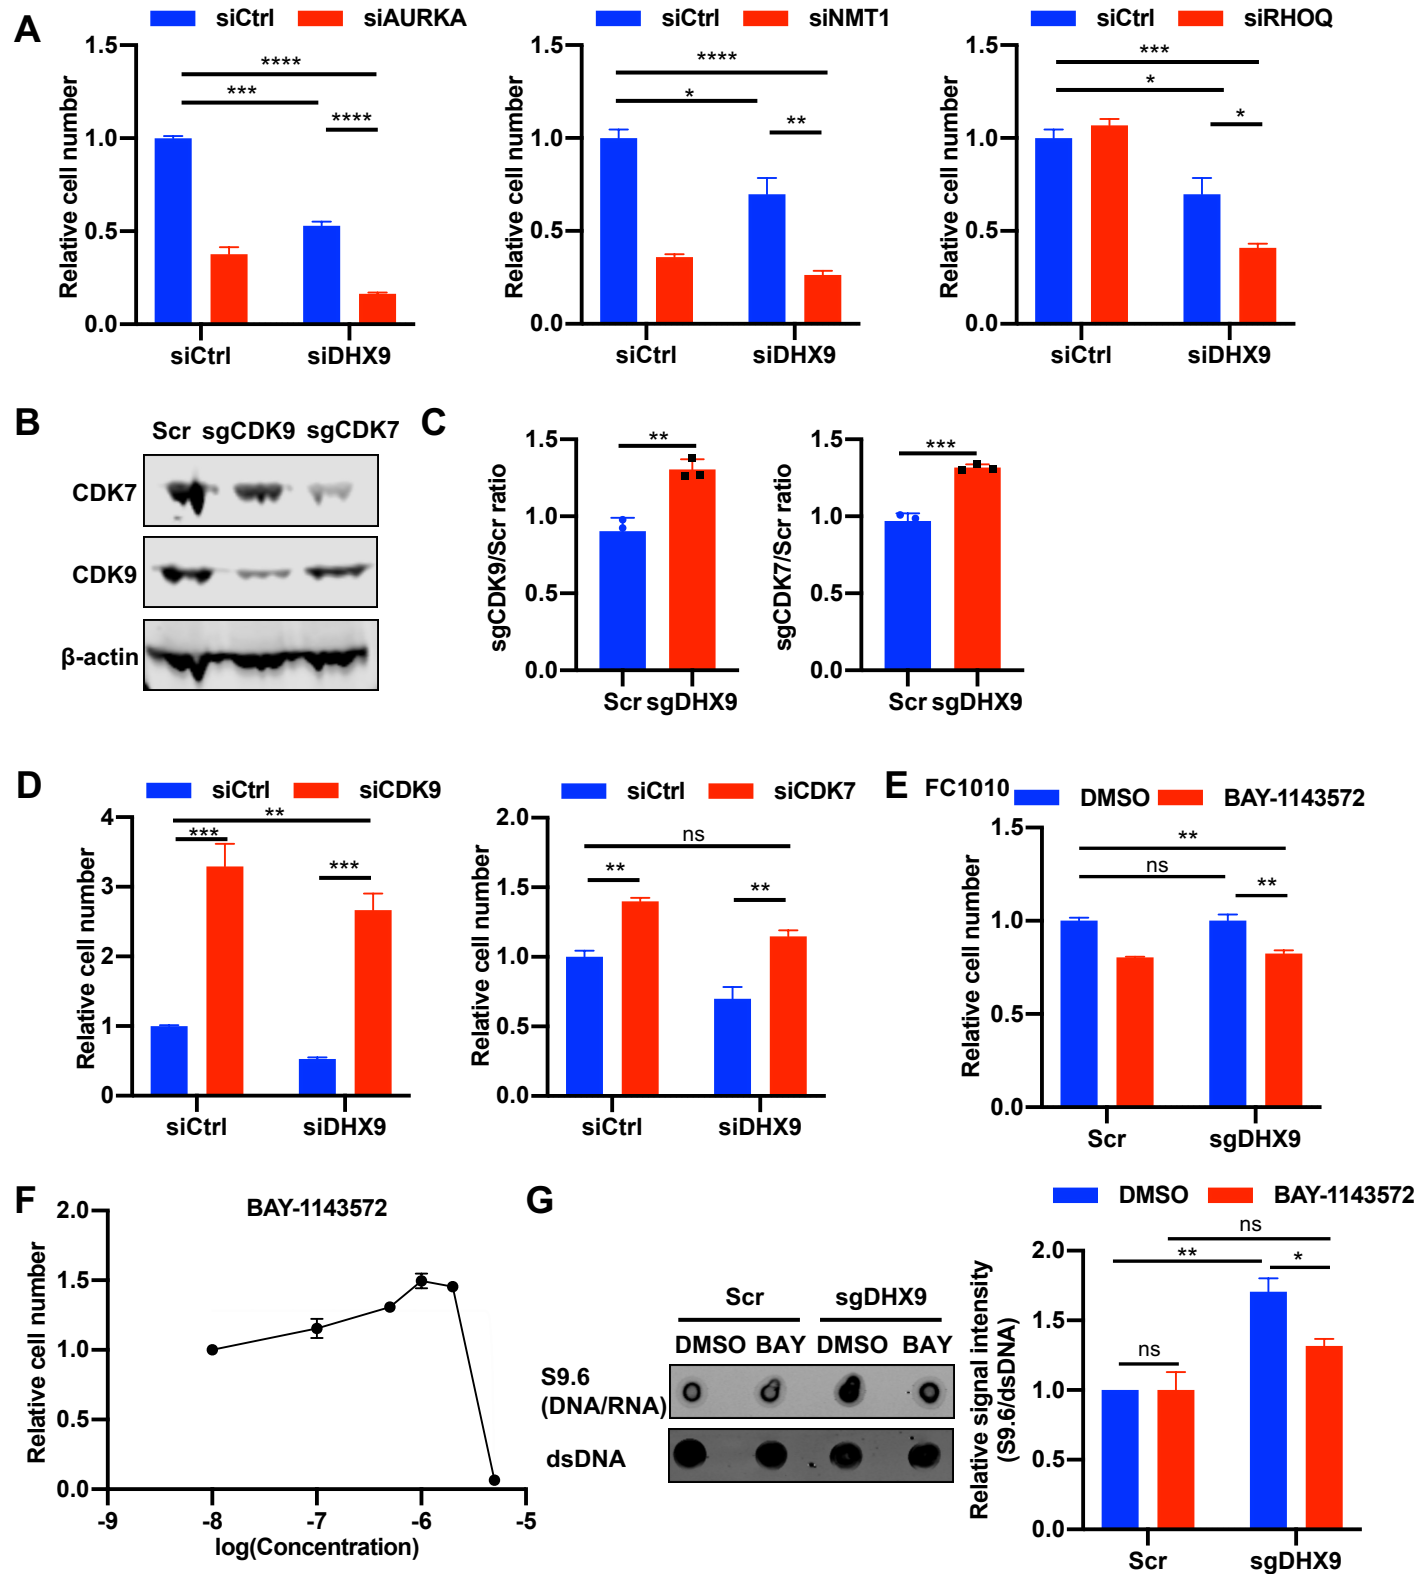

# Supplementary Figure S5 (continued)

**H**

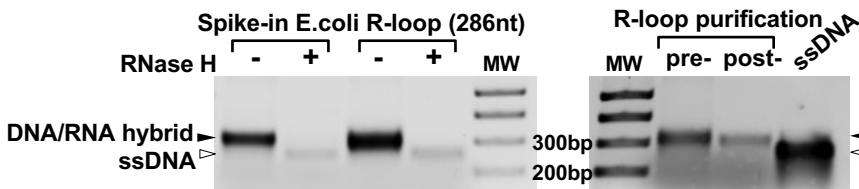

**J**

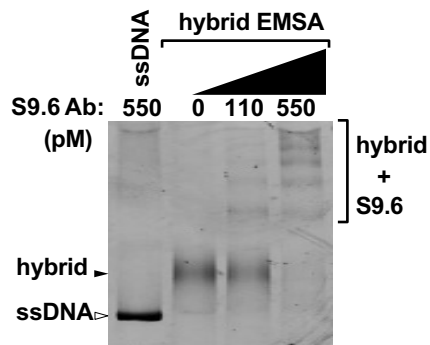

**K**

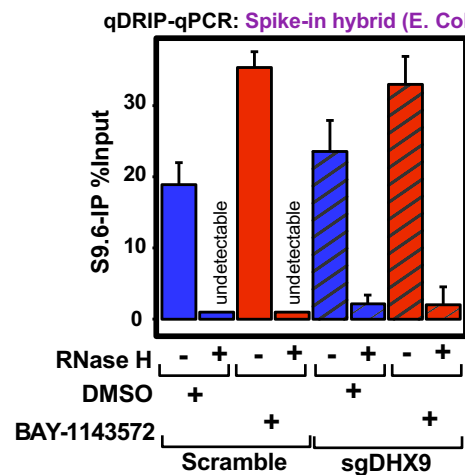

**L**

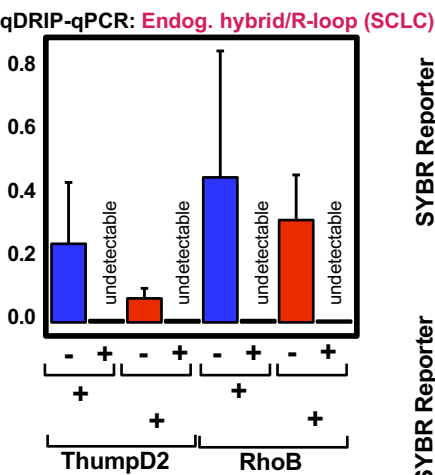

**M**

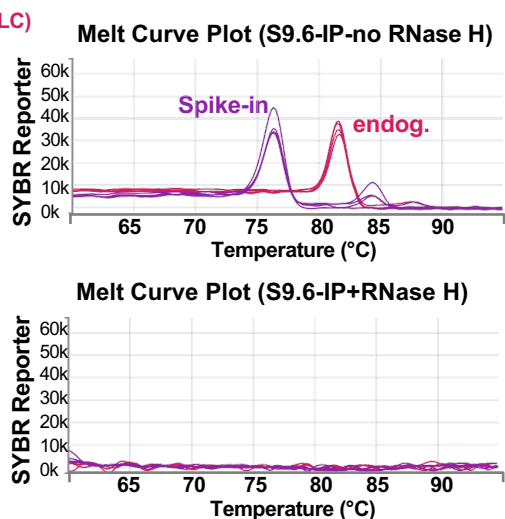

**N**

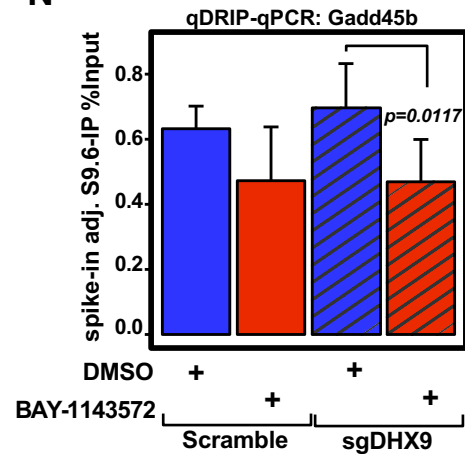

**O**

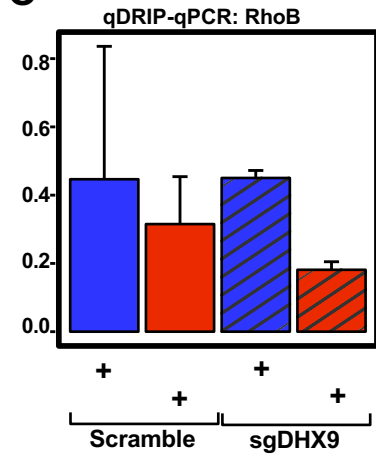

**P**

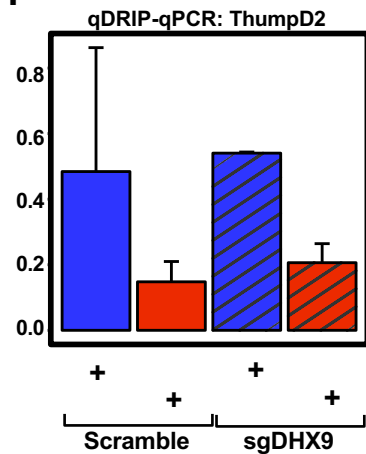

**Q**

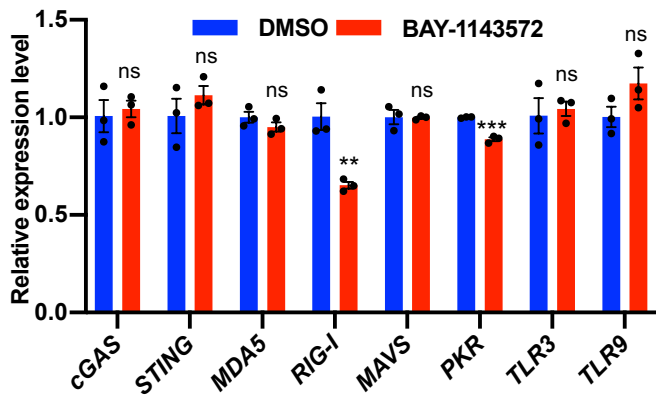

### Supplementary Figure S5.

**A**, Relative cell number of H82 cells, transfected with the indicated siRNAs, targeting genes depleted in the CRISPR screen. Luminescence of CellTiter-Glo was detected on Day 4 after seeding (n = 3). **B**, Immunoblot (IB) of the indicated proteins in H82 cells (Scramble, sgCDK9 and sgCDK7). **C**, The ratios of sgCDK9/Scr and sgCDK7/Scr cell number were compared in the background of Scramble and sgDHX9. Luminescence of CellTiter-Glo was detected on Day 4 after seeding (n = 3). **D**, Relative cell number of H82 cells, transfected with the indicated siRNAs, targeting genes enriched in the CRISPR screen. Luminescence of CellTiter-Glo was detected on Day 4 after seeding (n = 3). **E**, Relative cell number of Scramble and sgDHX9 FC1010 cells, treated with DMSO or 0.5  $\mu$ M BAY-1143572. Luminescence of CellTiter-Glo was detected on Day 4 after seeding (n = 3). **F**, Relative cell number of H82 cells, treated with 0.01, 0.1, 0.5, 1.0, 2.0, 5.0  $\mu$ M BAY-1143572. DMSO-treated control was used as a reference. Luminescence of CellTiter-Glo was detected on Day 4 after seeding (n = 3). **G**, Representative dot blots of DNA/RNA hybrids (S9.6) of Scramble and sgDHX9 H82 cells treated with DMSO or 0.5  $\mu$ M BAY-1143572 (left) and quantifications from 3 biological replicates (right). dsDNA was used as a reference. **H**, Two independent *E. coli* synthetic R-loop reconstitutions as the spike-in reference for qDRIP. Agarose gel electrophoresis showing the R-loop species (solid triangle) are sensitive to RNase H digestion, leaving a 286nt single strand DNA (ssDNA, open triangle) as shown by M.W (DNA molecular weight ladder). **I**, Reconstituted *E. coli* R-loop fraction “pre-” was gel-purified and visualized as “post-”, in comparison with an ssDNA reference to show the recovery percentage (~around 40%) and the product integrity. **J**, R-loop EMSA (Electrophoretic Mobility Shift Assay) incubating synthetic *E. coli* R-loop (550 pM) with the indicated concentration of antibody raised against R-loop (S9.6 Ab, 0/110/550 pM). S9.6-bound R-loop signal indicated as “R-loop+S9.6”. ssDNA, as a negative control, showed only background EMSA signal near the gel well. **K**, Synthetic spike-in recovery across four qDRIP experiments (Scramble or sgDHX9, treated with DMSO or the CDK9 inhibitor - BAY1143572), quantitated as a percentage value of IPed DNA divided by Input DNA per quantitative PCR (qPCR); RNase H treatment showed undetectable or depleted signal. **L**, Endogenous (Endog.) R-loop recovery from H82 small cell lung cancer (SCLC) at two genes: ThumpD2 and RhoB. All RNase H treated samples showed undetectable signals. **M**, Melting Curve analyses of qDRIP-qPCR amplicons (the spike-in and an endogenous R-loop), either with no RNase H (upper panel) or with RNase H (lower panel). **N-P**, qDRIP-qPCR signal at Gadd45b, RhoB, and ThumpD2 genes across the four indicated experimental conditions (n= 2). **Q**, qRT-PCR analysis of the indicated genes comparing H196 cells with the indicated sgRNA vectors (n = 3). 36B4 gene was used as a reference. DNA fiber assay of Scramble and sgDHX9 H82 cells treated with DMSO or 0.5  $\mu$ M BAY-1143572.

Data represent mean  $\pm$  SEM. ns, not significant; \* $p < 0.05$ , \*\* $p < 0.01$ , \*\*\* $p < 0.001$ , \*\*\*\* $p < 0.0001$  by unpaired Student's t test (C and H), paired t-test (N), two-way ANOVA followed by Tukey's multiple comparisons test (A, D, E and G).
