# Supplementary material for: Targeting DHX9 Triggers Tumor-Intrinsic Interferon Response and Replication Stress in Small Cell Lung Cancer
Source: PubMed Central journal article supplement — Cancer Discov. 2024 Jan 4;14(3):468–91. doi: 10.1158/2159-8290.CD-23-0486 (PMC10905673; doi:10.1158/2159-8290.cd-23-0486), 2024-01-04
Supplement: cd-23-0486_supplementary_figure_s6_suppsf6.pdf [file cd-23-0486_supplementary_figure_s6_suppsf6.pdf]

# Supplementary Figure S6

**A**

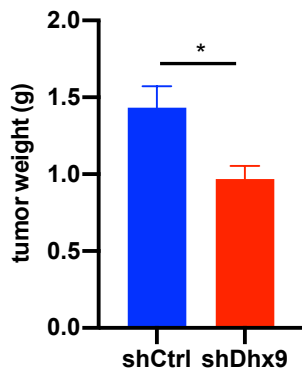

**B**

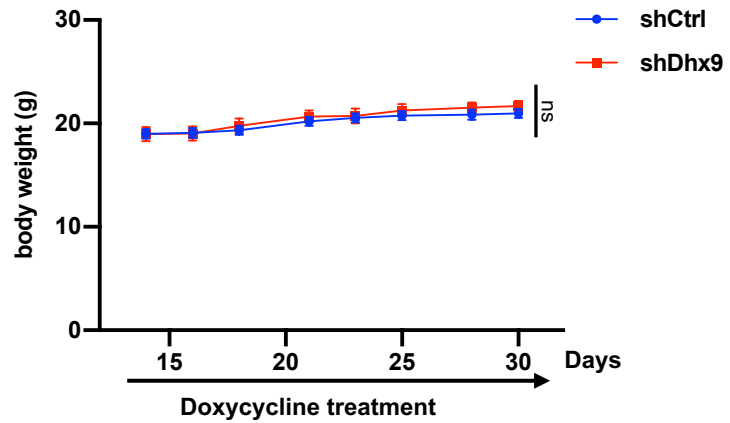

**C**

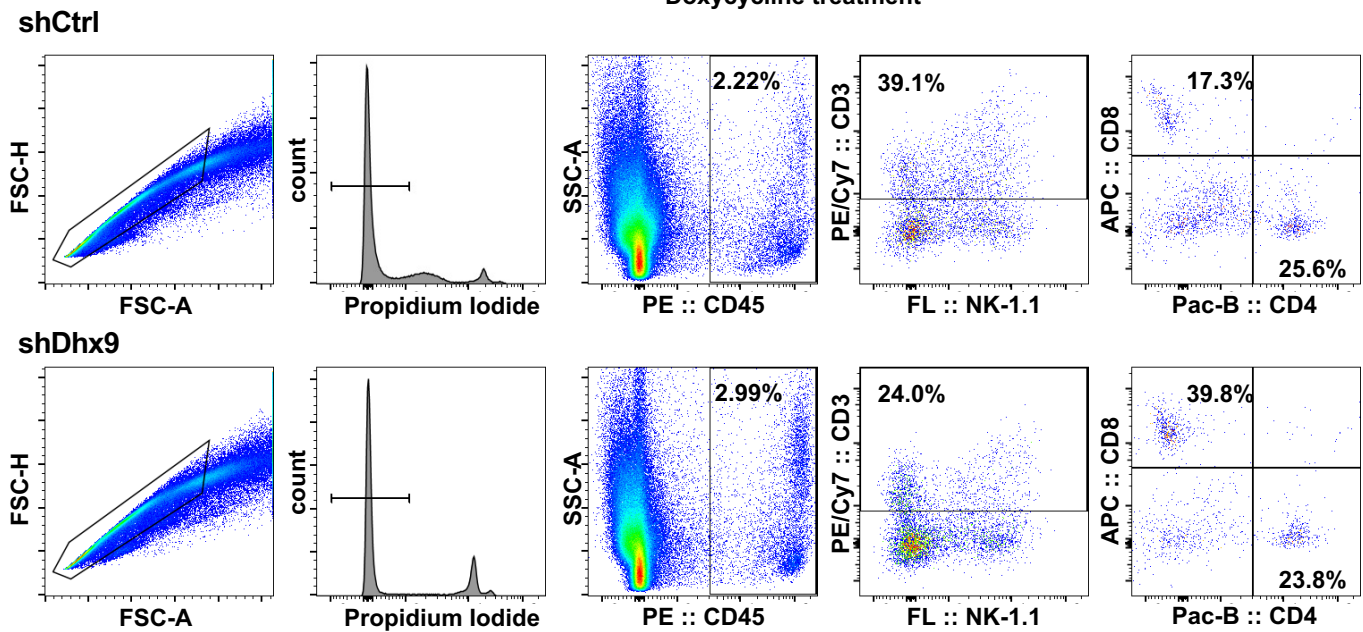

**D**

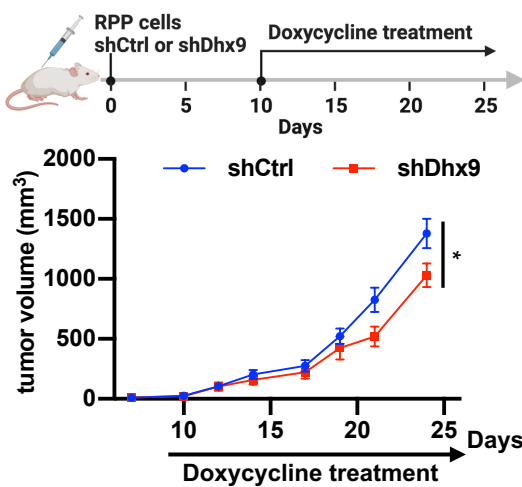

**E**

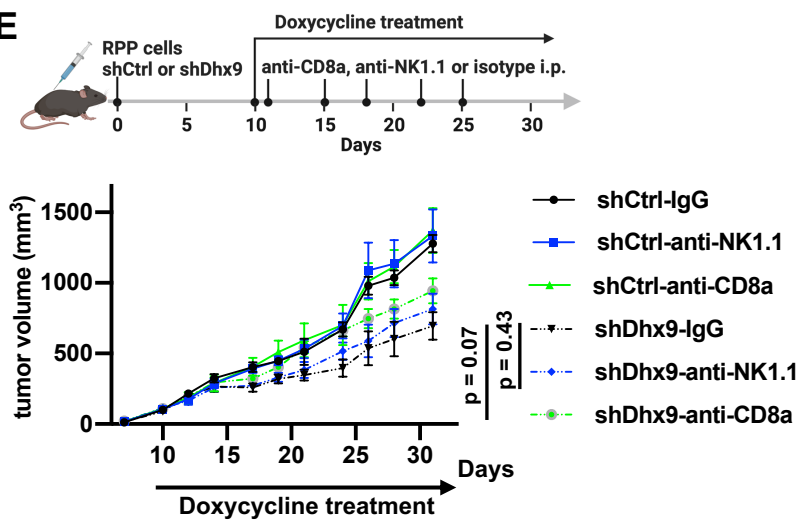

# Supplementary Figure S6 (continued)

**F**

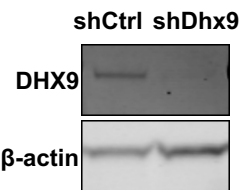

**G**

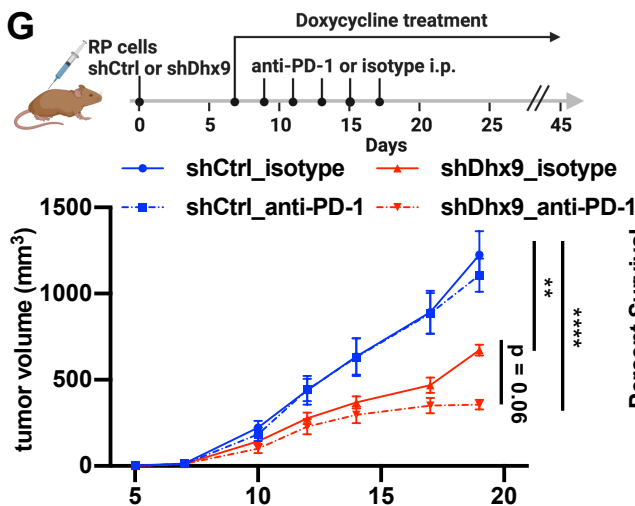

**H**

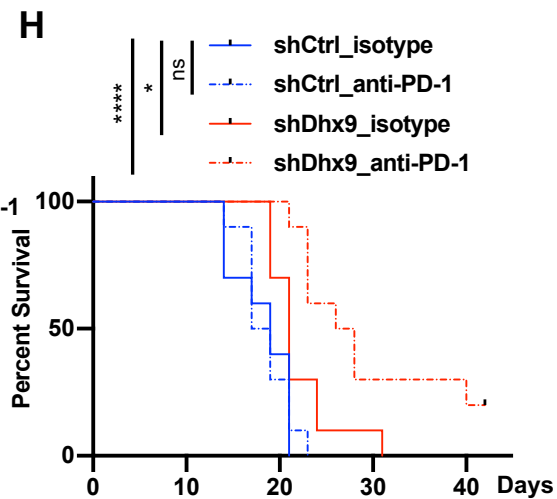

**I**

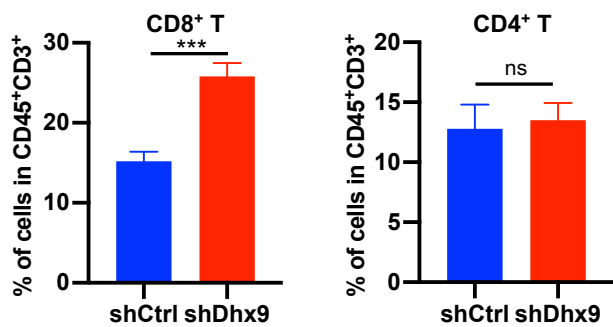

**J**

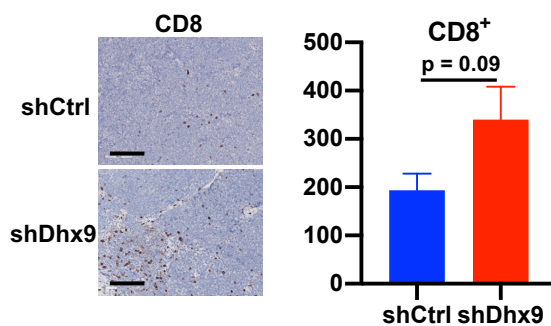

### Supplementary Figure S6.

**A**, Tumor weight of shCtrl and shDhx9 RPP tumors (n = 6), collected on day 32 post-inoculation. **B**, Body weight changes of mice, injected with shCtrl and shDhx9 RPP tumors (n = 6). **C**, Gating strategy used to analyze CD8<sup>+</sup> and CD4<sup>+</sup> T cells, infiltrated in shCtrl and shDhx9 RPP tumors. First, single cells were selected in FSC-A vs FSC-H plot, followed by gating of Propidium Iodide negative population. CD45 positive cells were selected in PE-CD45 vs SSC-A plot. Then, CD3 positive cells were selected in FL-NK-1.1 vs PE/Cy7-CD3 plot. Lastly, CD4-positive and CD8-positive populations were analyzed in the CD45<sup>+</sup>/CD3<sup>+</sup> cells. The compensation was set using single-stained compensation controls. Compensation settings used in this assay was summarized in Supplementary Table S6. **D**, Tumor growth curves of shCtrl and shDhx9 RPP tumors in NSG mice (n = 6). **E**, Tumor growth curves of shCtrl and shDhx9 RPP tumors in C57BL/6 mice, treated with anti-CD8a antibody, anti-NK1.1 antibody or isotype control (n = 6). **F**, Immunoblot (IB) of DHX9 expression in shCtrl and shDhx9 RP cells treated with DOX. **G**, Tumor growth curves of shCtrl and shDhx9 RP tumors treated with isotype control or anti-PD-1 antibody (n = 10). **H**, Survival curves for mice in (G). **I**, Flow cytometry quantification of infiltrating CD8<sup>+</sup> T cells and CD4<sup>+</sup> T cells of CD45<sup>+</sup>CD3<sup>+</sup> cells in shCtrl and shDhx9 RP tumors (n = 6). **J**, Representative IHC images of indicated infiltrating immune cells in shCtrl and shDhx9 RPP tumors (left) and quantification (n = 5) (right). Scale bar = 100  $\mu$ m.

Data represent mean  $\pm$  SEM. ns, not significant; \*p < 0.05, \*\*p < 0.01, \*\*\*p < 0.001, \*\*\*\*p < 0.0001 by unpaired Student's t test (A, B, D, I and J), two-way ANOVA followed by Tukey's multiple comparisons test (E and G) and log-rank test (H).
